# Supplementary material
Source: PubMed Central journal article supplement (PMC4120929)
Supplement: Supp_Figure1.pdf [file Supp_Figure1.pdf]

## Supplementary Data

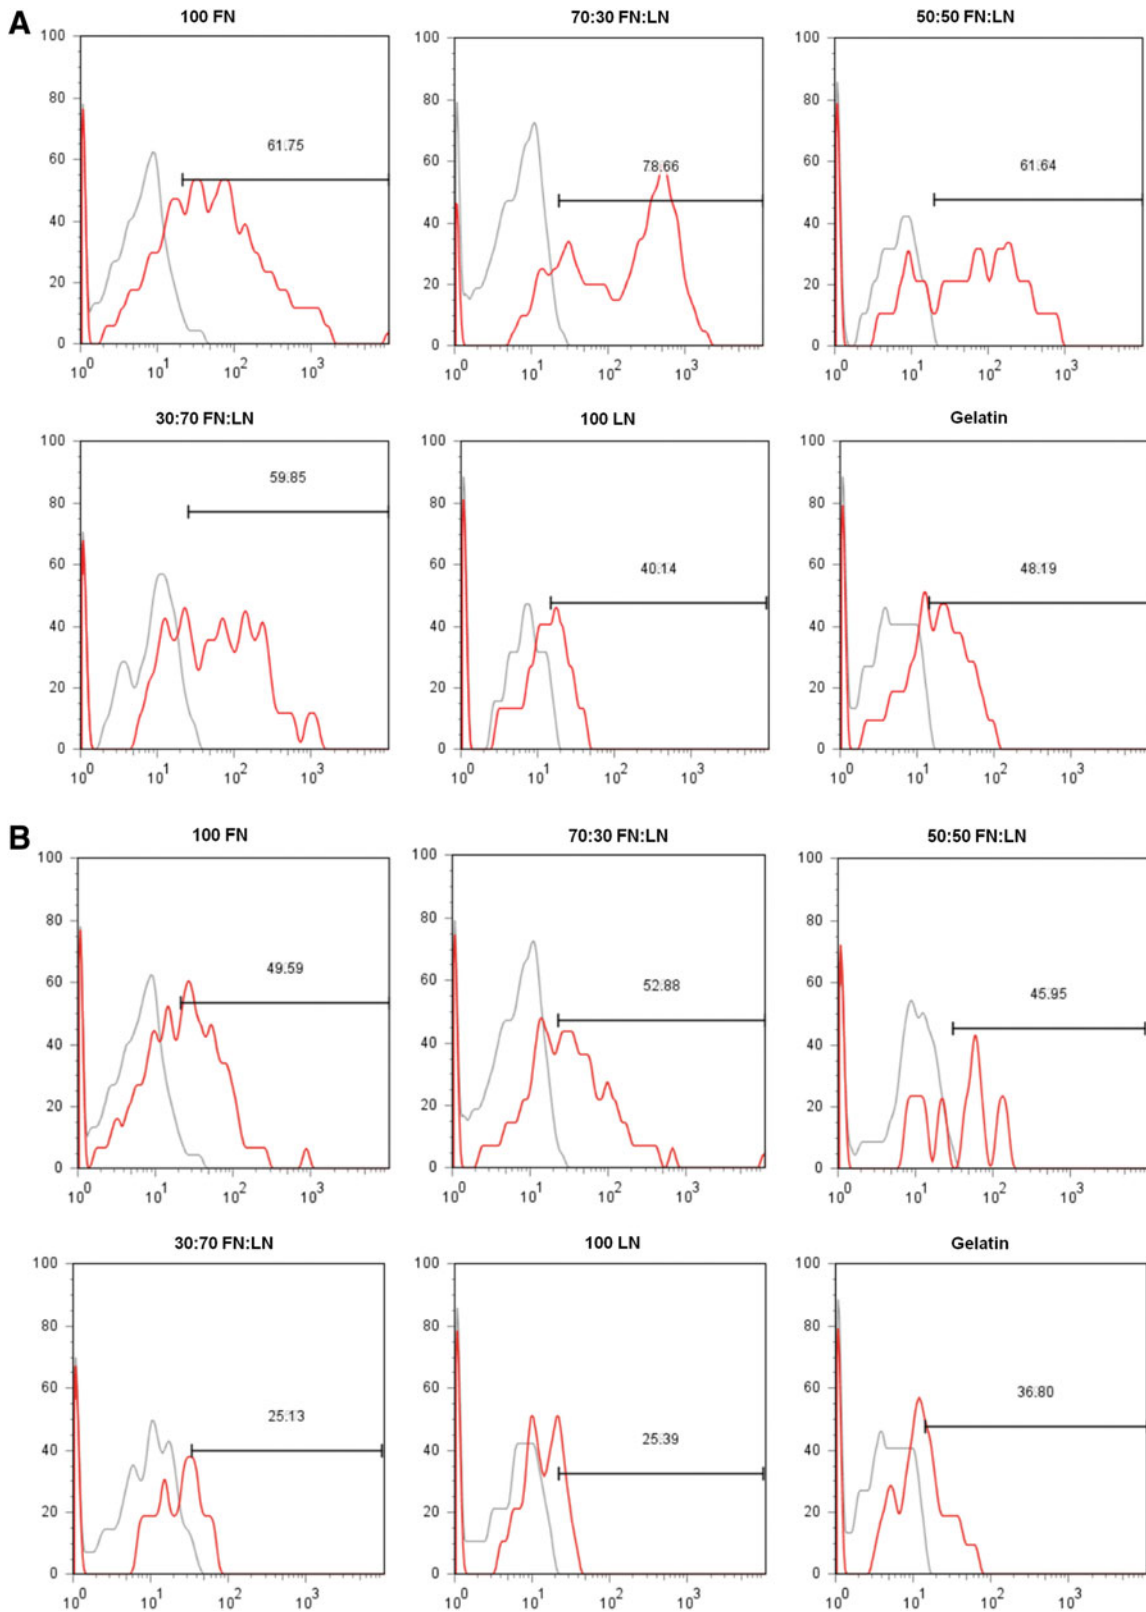

**SUPPLEMENTARY FIG. S1.** Representative data corresponding to Fig. 1. **(A)** Histograms of cTnI expression of differentiated H7 cultures on different ECM. **(B)** Histograms of Nkx2.5 expression of differentiated H7 cultures on different ECM. **(C)** Histograms of cTnI expression of differentiated H9 cultures on different ECM. **(D)** Histograms of Nkx2.5 expression of differentiated H9 cultures on different ECM.

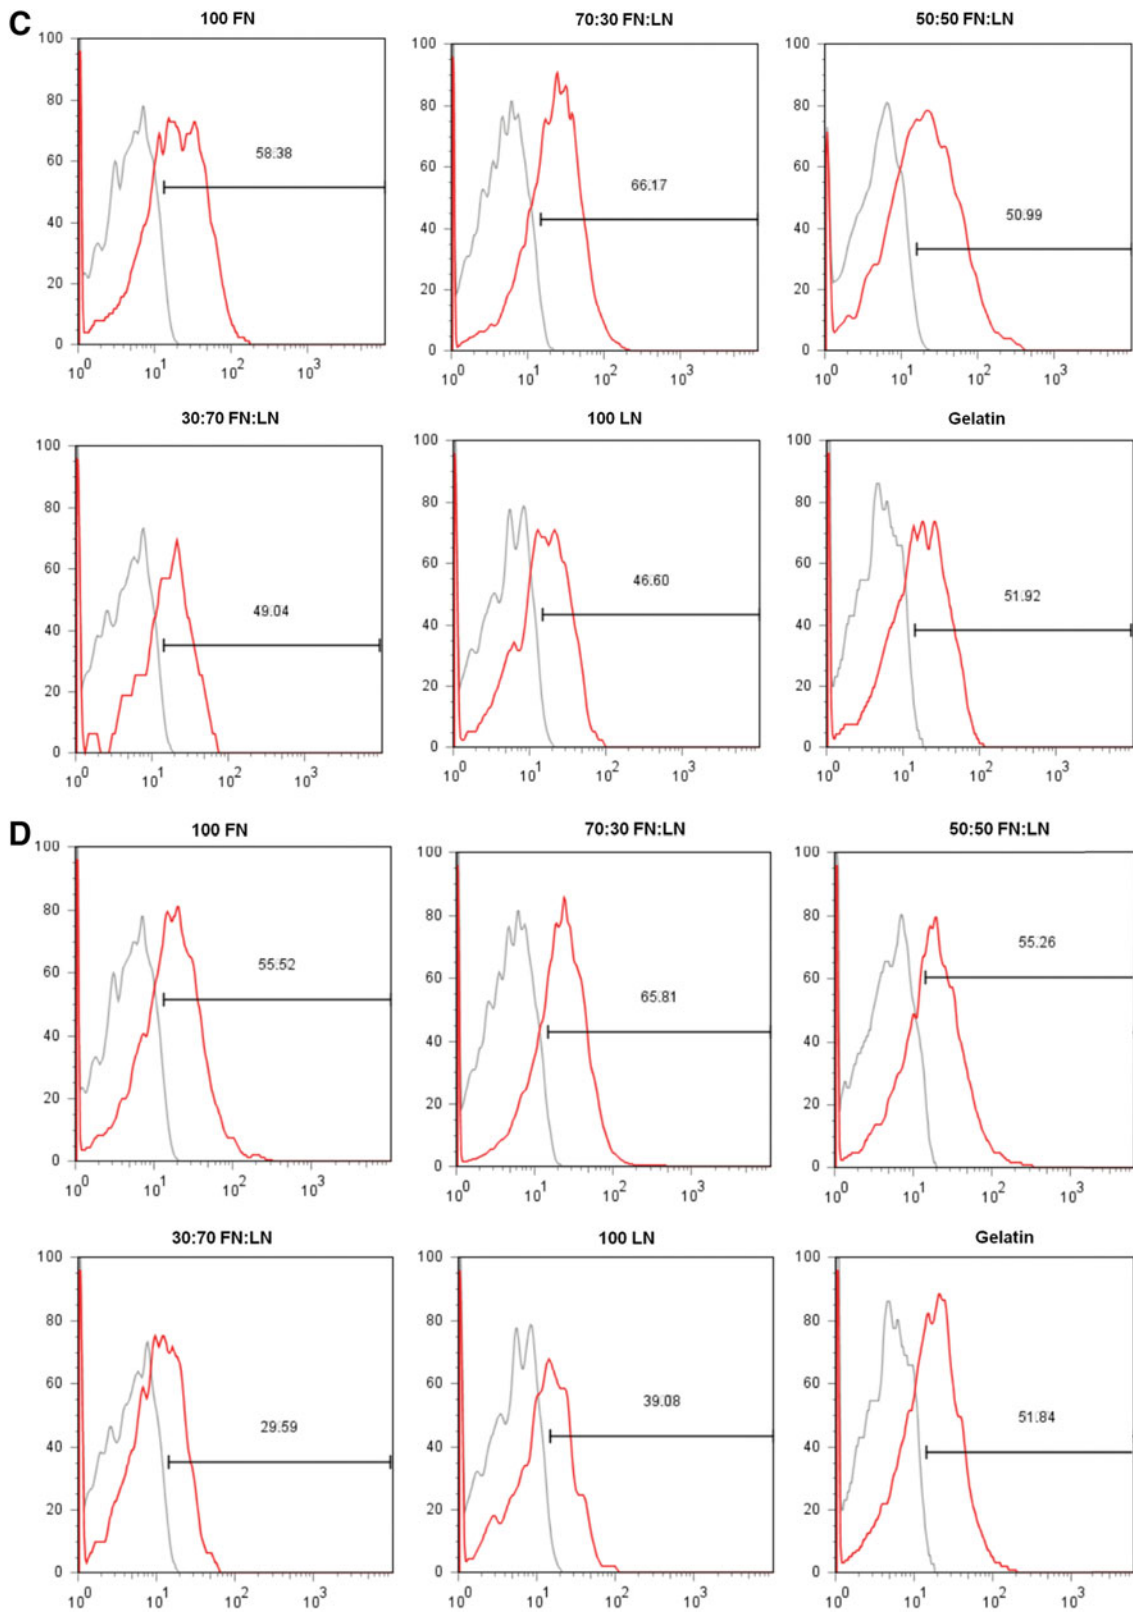

**SUPPLEMENTARY FIG. S1.** (Continued).
