# Supplementary material
Source: PubMed Central journal article supplement (PMC4120929)
Supplement: Supp_Figure2.pdf [file Supp_Figure2.pdf]

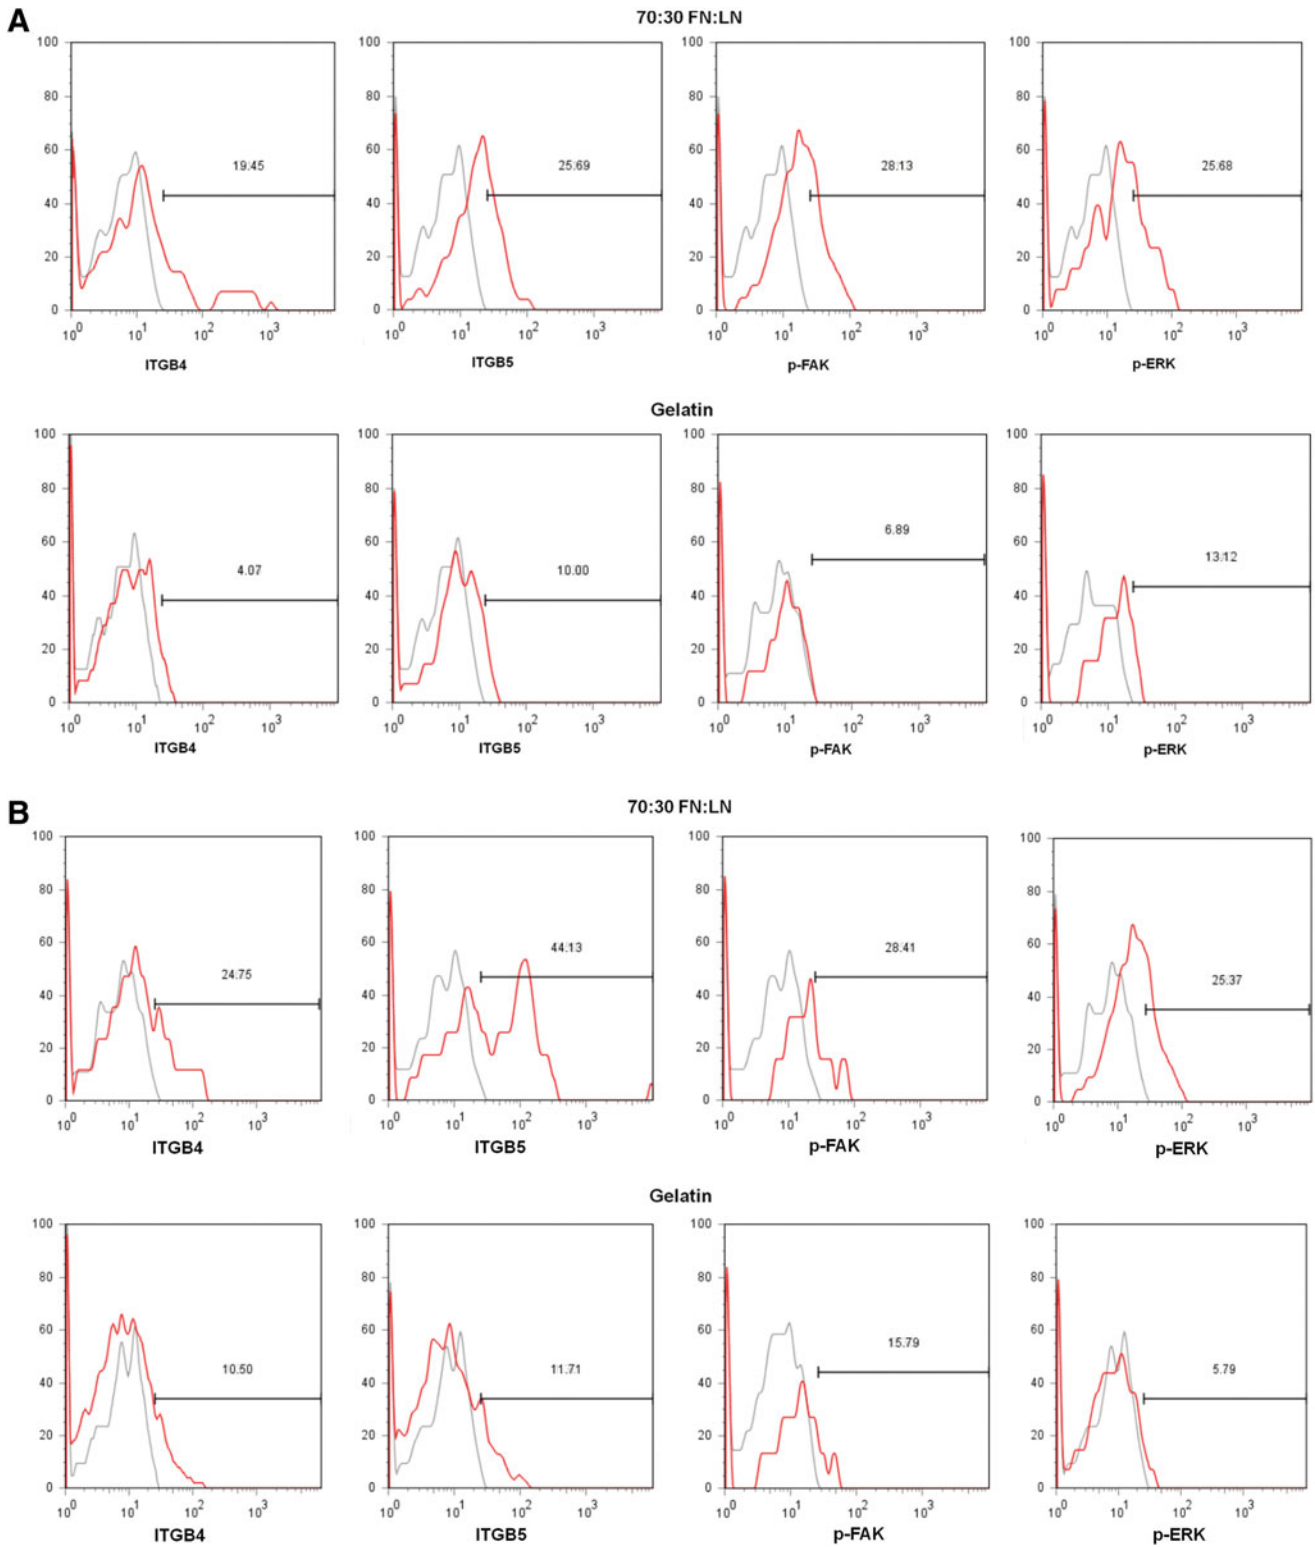

**SUPPLEMENTARY FIG. S2.** Representative data corresponding to Fig. 3. **(A)** Histograms of ITGB4, ITGB5, p-FAK, and p-ERK expression of differentiated H7 cultures on 70:30 FN:LN and gelatin. **(B)** Histograms of ITGB4, ITGB5, p-FAK, and p-ERK expression of differentiated H9 cultures on 70:30 FN:LN and gelatin.
