# Supplementary material
Source: PubMed Central journal article supplement (PMC4120929)
Supplement: Supp_Figure3.pdf [file Supp_Figure3.pdf]

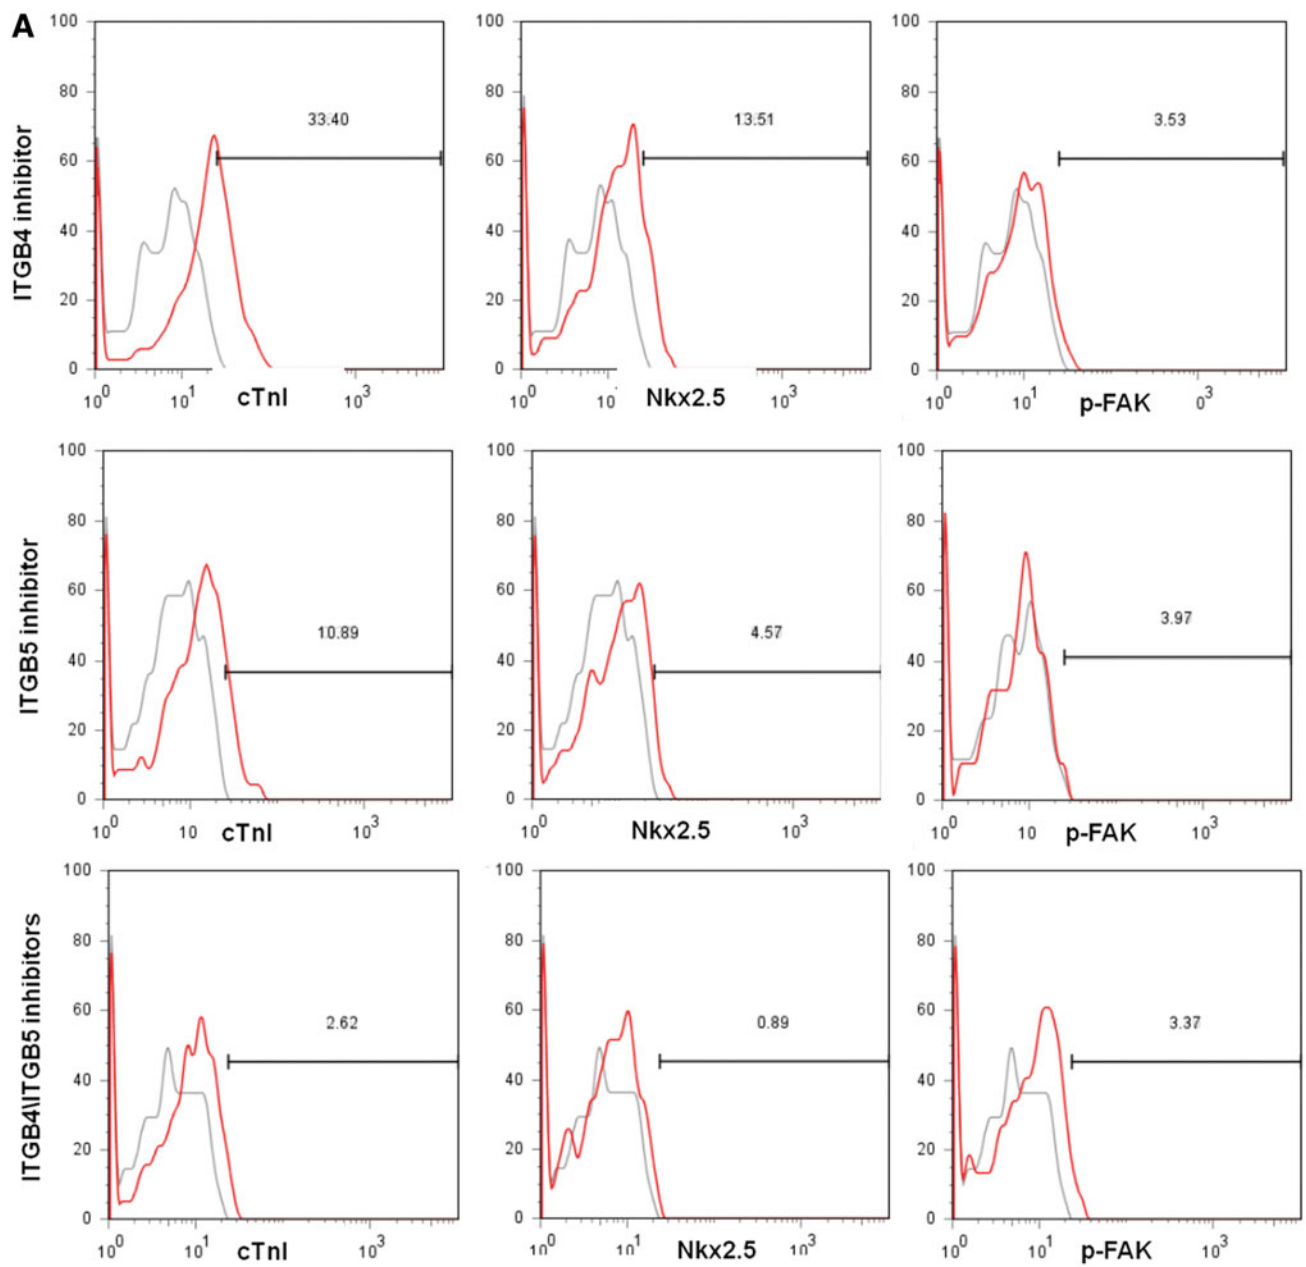

**SUPPLEMENTARY FIG. S3.** Representative data corresponding to Fig. 4. **(A)** Histograms cTnI, Nkx, and p-FAK expression of differentiated H7 cultures on 70:30 FN:LN and those treated with ITGB4 and/or ITGB5 blocking antibodies. **(B)** Histograms of cTnI, Nkx, and p-FAK expression of differentiated H9 cultures on 70:30 FN:LN and those treated with ITGB4 and/or ITGB5 blocking antibodies.

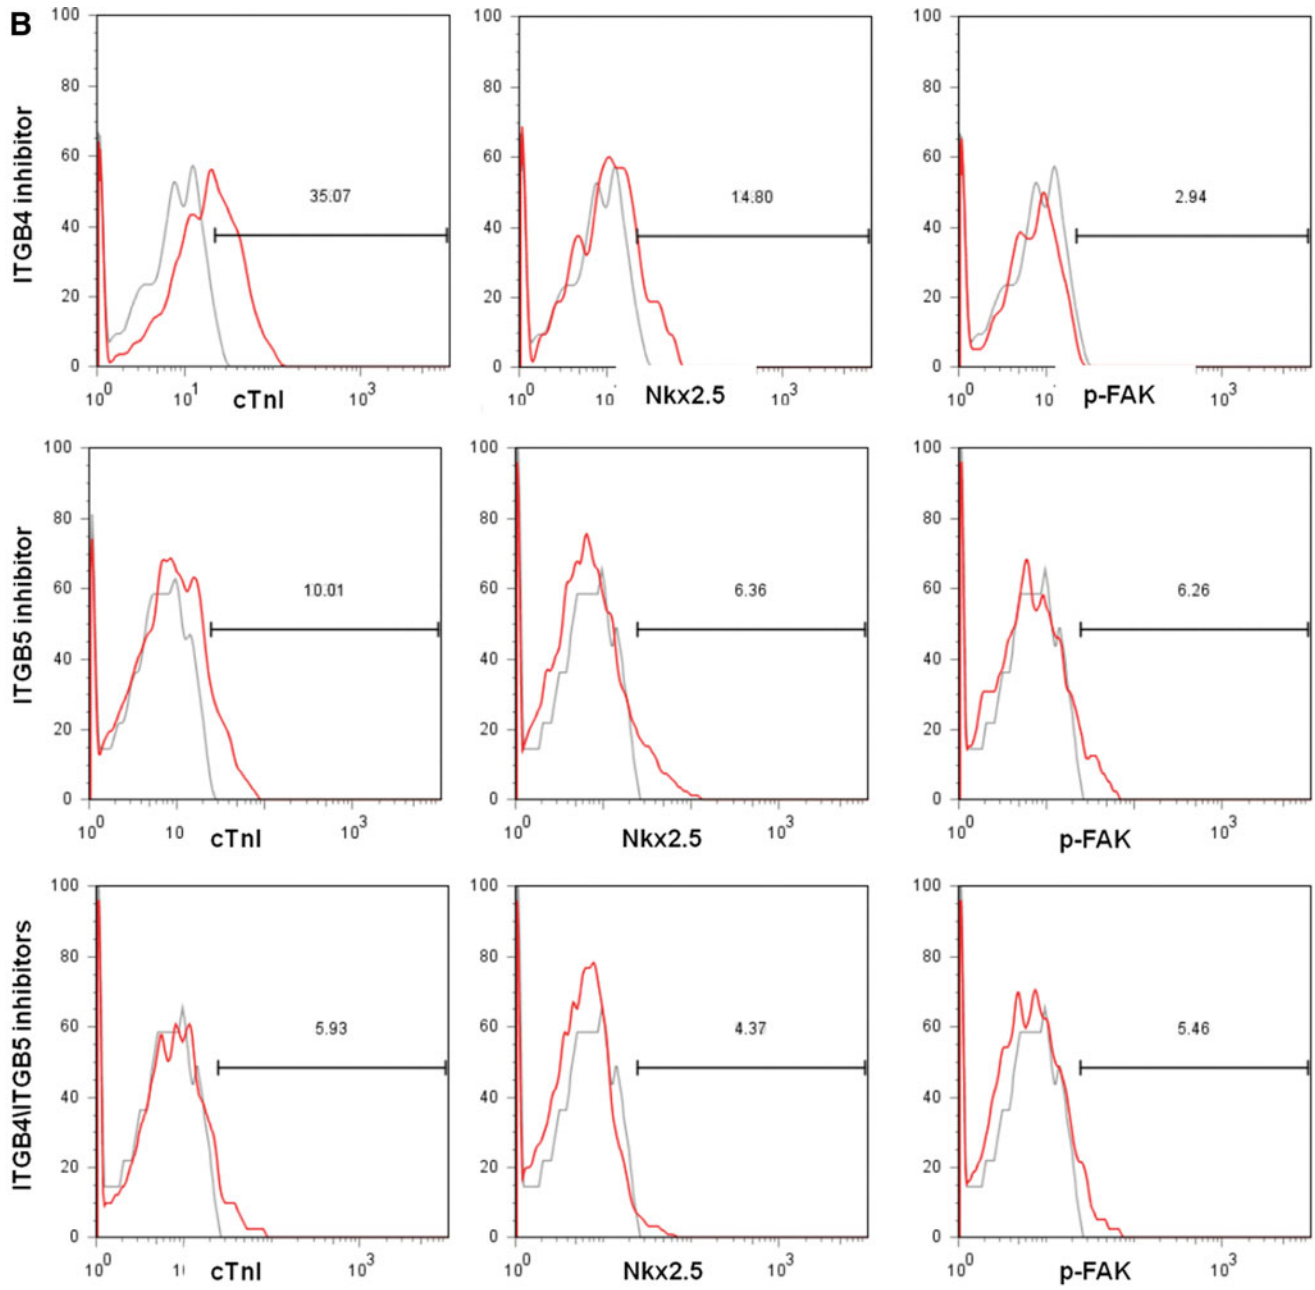

SUPPLEMENTARY FIG. S3. (Continued).
