# Supplementary material
Source: PubMed Central journal article supplement (PMC4120929)
Supplement: Supp_Figure4.pdf [file Supp_Figure4.pdf]

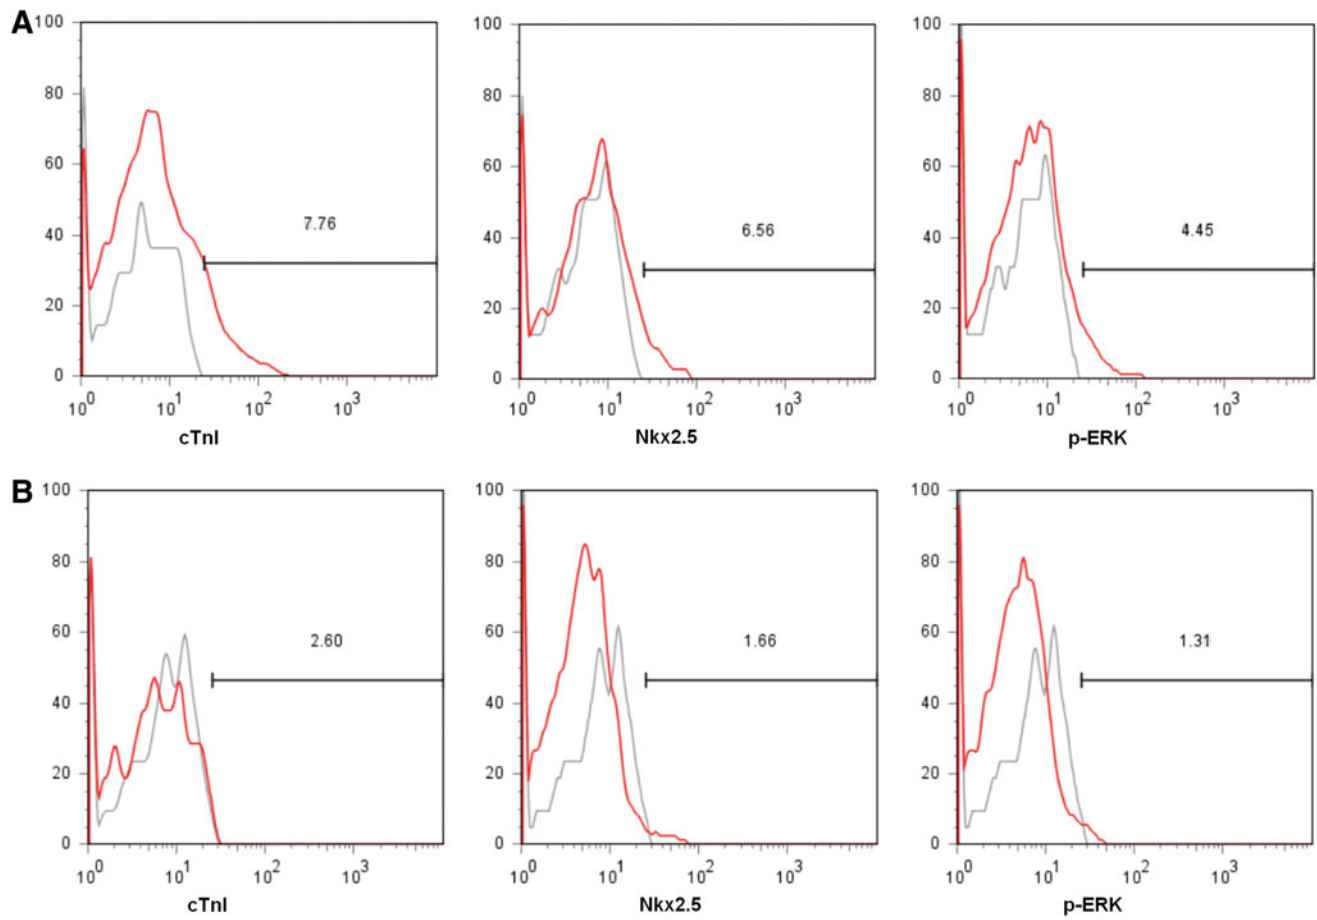

**SUPPLEMENTARY FIG. S4.** Representative data corresponding to Figure 4. To determine the role of MEK signaling in cardiac fate, the MEK signaling was blocked with U0126 inhibitor, and subsequent expression of cTnI, Nkx2.5, and p-ERK was measured for H7 (**A**) and H9 (**B**) cells differentiated on 70:30 FN:LN.
